# Supplementary material
Source: PubMed Central journal article supplement (PMC9539542)
Supplement: mmc1.pdf [file mmc1.pdf]

# THE LANCET

## Supplementary appendix

This appendix formed part of the original submission and has been peer reviewed. We post it as supplied by the authors.

Supplement to: Sachs JD, Abdool Karim SS, Akinin L, et al. The *Lancet* Commission on lessons for the future from the COVID-19 pandemic. *Lancet* 2022; published online Sept 14. [https://doi.org/10.1016/S0140-6736\(22\)01585-9](https://doi.org/10.1016/S0140-6736(22)01585-9).

## Appendix 1. WHO Member States in the WHO Regions

| African Region               | Region of the Americas             | Eastern Mediterranean Region | European Region                                      | South-East Asian Region               | Western Pacific Region           |
|------------------------------|------------------------------------|------------------------------|------------------------------------------------------|---------------------------------------|----------------------------------|
| Algeria                      | Antigua and Barbuda                | Afghanistan                  | Albania                                              | Bangladesh                            | Australia                        |
| Angola                       | Argentina                          | Bahrain                      | Andorra                                              | Bhutan                                | Brunei Darussalam                |
| Benin                        | Bahamas                            | Djibouti                     | Armenia                                              | Democratic People's Republic of Korea | Cambodia                         |
| Botswana                     | Barbados                           | Egypt                        | Austria                                              | India                                 | China                            |
| Burkina Faso                 | Belize                             | Iran (Islamic Republic of)   | Azerbaijan                                           | Indonesia                             | Cook Islands                     |
| Burundi                      | Bolivia (Plurinational State of)   | Iraq                         | Belarus                                              | Maldives                              | Fiji                             |
| Cabo Verde                   | Brazil                             | Jordan                       | Belgium                                              | Myanmar                               | Japan                            |
| Cameroon                     | Canada                             | Kuwait                       | Bosnia and Herzegovina                               | Nepal                                 | Kiribati                         |
| Central African Republic     | Chile                              | Lebanon                      | Bulgaria                                             | Sri Lanka                             | Lao PDR                          |
| Chad                         | Colombia                           | Libya                        | Croatia                                              | Thailand                              | Malaysia                         |
| Comoros                      | Costa Rica                         | Morocco                      | Cyprus                                               | Timor-Leste                           | Marshall Islands                 |
| Congo                        | Cuba                               | Oman                         | Czechia                                              |                                       | Micronesia (Federated States of) |
| Cote d'Ivoire                | Dominica                           | Pakistan                     | Denmark                                              |                                       | Mongolia                         |
| Democratic Republic of Congo | Dominican Republic                 | Qatar                        | Estonia                                              |                                       | Nauru                            |
| Equatorial Guinea            | Ecuador                            | Saudi Arabia                 | Finland                                              |                                       | New Zealand                      |
| Eritrea                      | El Salvador                        | Somalia                      | France                                               |                                       | Niue                             |
| Eswatini                     | Grenada                            | Sudan                        | Georgia                                              |                                       | Palau                            |
| Ethiopia                     | Guatemala                          | Syria Arab Republic          | Germany                                              |                                       | Papua New Guinea                 |
| Gabon                        | Guyana                             | Tunisia                      | Greece                                               |                                       | Philippines                      |
| Gambia                       | Haiti                              | United Arab Emirates         | Hungary                                              |                                       | Republic of Korea                |
| Ghana                        | Honduras                           | Yemen                        | Iceland                                              |                                       | Samoa                            |
| Guinea                       | Jamaica                            |                              | Ireland                                              |                                       | Singapore                        |
| Guinea-Bissau                | Mexico                             |                              | Israel                                               |                                       | Solomon Islands                  |
| Kenya                        | Montserrat                         |                              | Italy                                                |                                       | Tonga                            |
| Lesotho                      | Nicaragua                          |                              | Kazakhstan                                           |                                       | Tuvalu                           |
| Liberia                      | Panama                             |                              | Kyrgyzstan                                           |                                       | Vanuatu                          |
| Madagascar                   | Paraguay                           |                              | Latvia                                               |                                       | Viet Nam                         |
| Malawi                       | Peru                               |                              | Lithuania                                            |                                       |                                  |
| Mali                         | Saint Kitts and Nevis              |                              | Luxembourg                                           |                                       |                                  |
| Mauritania                   | Saint Lucia                        |                              | Malta                                                |                                       |                                  |
| Mauritius                    | Saint Vincent and the Grenadines   |                              | Monaco                                               |                                       |                                  |
| Mozambique                   | Suriname                           |                              | Montenegro                                           |                                       |                                  |
| Namibia                      | Trinidad and Tobago                |                              | Netherlands                                          |                                       |                                  |
| Niger                        | United States                      |                              | North Macedonia                                      |                                       |                                  |
| Nigeria                      | Uruguay                            |                              | Norway                                               |                                       |                                  |
| Rwanda                       | Venezuela (Bolivarian Republic of) |                              | Poland                                               |                                       |                                  |
| Sao Tome and Principe        |                                    |                              | Portugal                                             |                                       |                                  |
| Senegal                      |                                    |                              | Romania                                              |                                       |                                  |
| Seychelles                   |                                    |                              | Russian Federation                                   |                                       |                                  |
| Sierra Leone                 |                                    |                              | San Marino                                           |                                       |                                  |
| South Africa                 |                                    |                              | Serbia                                               |                                       |                                  |
| South Sudan                  |                                    |                              | Slovakia                                             |                                       |                                  |
| Togo                         |                                    |                              | Slovenia                                             |                                       |                                  |
| Uganda                       |                                    |                              | Spain                                                |                                       |                                  |
| United Republic of Tanzania  |                                    |                              | Sweden                                               |                                       |                                  |
| Zambia                       |                                    |                              | Switzerland                                          |                                       |                                  |
| Zimbabwe                     |                                    |                              | Türkiye                                              |                                       |                                  |
|                              |                                    |                              | Tajikistan                                           |                                       |                                  |
|                              |                                    |                              | Ukraine                                              |                                       |                                  |
|                              |                                    |                              | Türkmenistan                                         |                                       |                                  |
|                              |                                    |                              | United Kingdom of Great Britain and Northern Ireland |                                       |                                  |
|                              |                                    |                              | Uzbekistan                                           |                                       |                                  |

Source: <https://www.who.int/countries>

## Appendix 2. Author List

### Commissioners of the *Lancet* COVID-19 Commission:

- Jeffrey D Sachs, Ph.D. (University Professor, Columbia University, USA [Chair])
- Salim S. Abdool Karim, M.B.Ch.B., Ph.D. (Mailman School of Public Health, Columbia University, USA)
- Lara Akinin, Ph.D. (Distinguished University Professor, Simon Fraser University, Canada)
- Joseph Allen, D.Sc. (Associate Professor of Exposure Assessment Science, Harvard T H Chan School of Public Health, USA)
- Kirsten Brosbøl, M.A. (Founder, Parliamentarians for the Global Goals, Former MP and Minister for the Environment, Denmark)
- Francesca Colombo, M.Sc. (Head of the Health Division at the Organisation for Economic Co-operation and Development, France)
- Gabriela Cuevas Barron, B.A. (Co-Chair of UHC2030 (Geneva, Switzerland), Honorary President of the Inter-Parliamentary Union and former Senator in the Mexican Congress, Mexico)
- María Fernanda Espinosa, M.A. (Richard von Weizsäcker Fellow at the Robert Bosch Academy, (Berlin, Germany) and former President of the UN General Assembly and former Minister of Foreign Affairs and Defense, Ecuador)
- Vitor Gaspar, Ph.D. (Director of the Fiscal Affairs Department, IMF, USA)
- Alejandro Gaviria, Ph.D. (Minister of National Education, Colombia)
- Andy Haines, F. Med. Sci (Professor of Environmental Change and Public Health, London School of Hygiene & Tropical Medicine, UK)
- Peter J Hotez, M.D., Ph.D. (Dean of the National School of Tropical Medicine, Baylor College of Medicine, USA)
- Phoebe Koundouri, Ph.D. (Professor in Economics, Athens University of Economics and Business and Denmark Technical University; President, European Association of Environmental and Resource Economists, Greece)
- Felipe Larraín Bascuñán, Ph.D. (Professor of Economics, Pontificia Universidad Católica de Chile and former Minister of Finance, Chile)
- Jong-Koo Lee, Ph.D. (Ambassador for Global Health Security and Professor of Family Medicine at Seoul National University College of Medicine, Republic of Korea)
- Muhammad Ali Pate, M.D., M.Sc., MBA (Julio Frenk Professor of Public Health and Leadership, Department of Global Health and Population, Harvard T H Chan School of Public Health, USA)
- Gabriela Ramos, M.A. (Assistant Director-General for Social and Human Sciences, UNESCO, France)
- K Srinath Reddy, DM (Card.) (President, Public Health Foundation of India, India)
- Ismail Serageldin, Ph.D. (Founding Director, Bibliotheca Alexandrina, Egypt)
- John Thwaites, LL.B. (Hons) (Chair, Monash Sustainable Development Institute, Australia)
- Vaira Vike-Freiberga, Ph.D. (Co-chair of the Nizami Ganjavi International Center, Azerbaijan, and Former President, Republic of Latvia)
- Chen Wang, M.D., Ph.D. (President, Chinese Academy of Medical Sciences, Peking Union Medical College, and Director, National Clinical Research Center for Respiratory Diseases, China)
- Miriam Khamadi Were, MB ChB, MPH, DrPH. (Vice Chair, The Champions of AIDS-Free Generation, Kenya)
- Lan Xue, Ph.D. (Cheung Kong Chair Distinguished Professor and Dean, Schwarzman College, Tsinghua University, China)

**Task Force Chairs of the *Lancet* COVID-19 Commission:**

Chandrika Bahadur, MPA, MBA (Chair, *Lancet* COVID-19 Commission India Task Force, India)

Maria Elena Bottazzi, Ph.D. (Associate Dean of the National School of Tropical Medicine, Baylor College of Medicine, USA)

Chris Bullen, Ph.D. (Professor in Public Health and Director of the National Institute for Health Innovation (NIHI),  
University of Auckland, New Zealand)

George Laryea-Adjei, Ph.D. (UNICEF Regional Director for South Asia, Nepal)

**Commission Secretariat and Staff of the *Lancet* COVID-19 Commission:**

Yanis Ben Amor, Ph.D. (Assistant Professor of Global Health and Microbiological Sciences, Executive Director,  
Center for Sustainable Development, Columbia University, USA)

Ozge Karadag, M.D., Ph.D. (Research Scholar, Center for Sustainable Development, Columbia University, USA)

Guillaume Lafortune, M.Sc. (Vice President and Head of Paris Office, United Nations Sustainable Development Solutions  
Network, France)

Emma Torres, M.A. (Vice President for the Americas and Head of the New York Office, United Nations Sustainable  
Development Solutions Network, USA)

Lauren Barredo, M.E.M. (Chief of Staff, NY Office, UN Sustainable Development Solutions Network, USA)

Juliana Bartels, B.A. (Special Assistant to the Director, Center for Sustainable Development, Columbia University, USA)

Neena Joshi, M.S. (Consultant, *Lancet* COVID-19 Commission, United Nations Sustainable Development Solutions Network, USA)

**Task Force Contributors of the *Lancet* COVID-19 Commission:**

Margaret Hellard, Ph.D. (Deputy Director, Burnet Institute, Australia)

Uyen Kim Huynh, Ph.D. (Chief of Innovation and Learning, UNICEF, Evaluation Office, USA)

Shweta Khandelwal, Ph.D. (Program Manager, India Task Force, *Lancet* COVID-19 Commission, and Head, Nutrition Research at  
the Public Health Foundation of India (PHFI), India)

Jeffrey V. Lazarus, Ph.D. (Head of the Health Systems Team, Barcelona Institute for Global Health (ISGlobal), Hospital Clinic,  
University of Barcelona, Spain)

Susan Michie, D.Phil. (Professor of Health Psychology, Director of the Centre for Behaviour Change,  
University College London, UK)
